# Supplementary material for: Differential effects of diesel exhaust particles on T cell differentiation and autoimmune disease
Source: PubMed Central journal article supplement (PMC6109291; doi:10.1186/s12989-018-0271-3), 2018-08-24
Supplement: 12989_2018_271_MOESM1_ESM.pdf [file 12989_2018_271_MOESM1_ESM.pdf]

**A**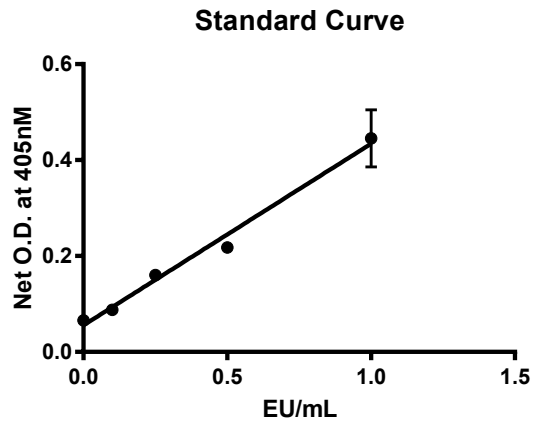**B**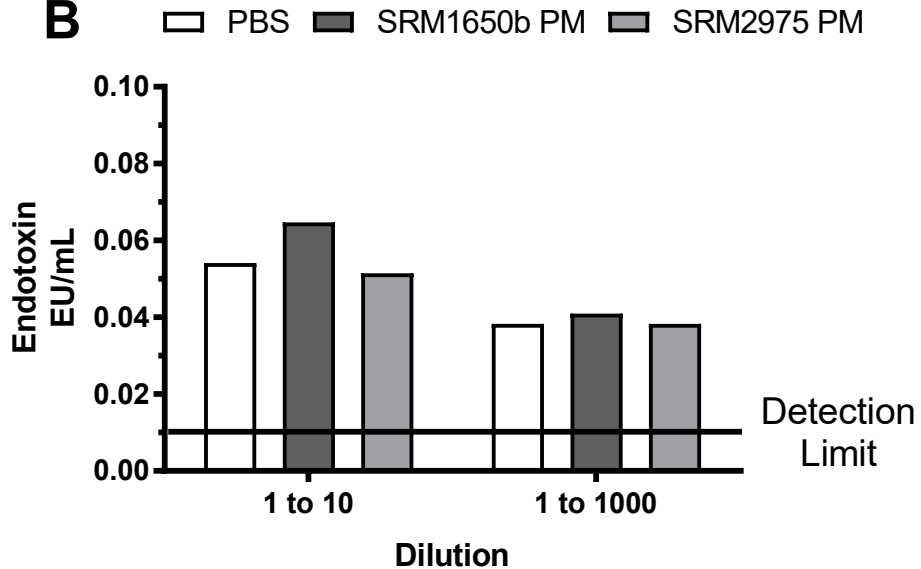

**A**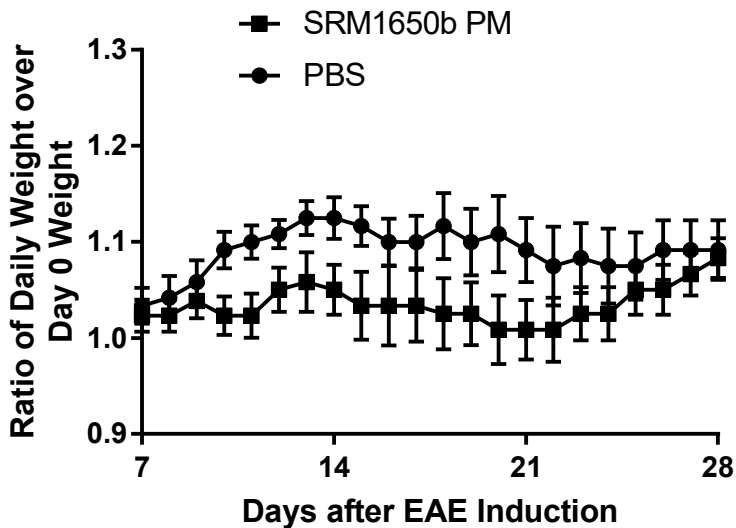**B**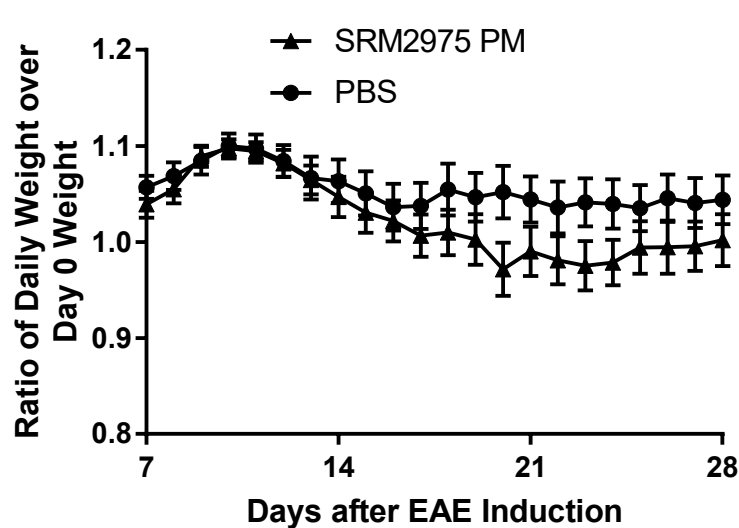**C**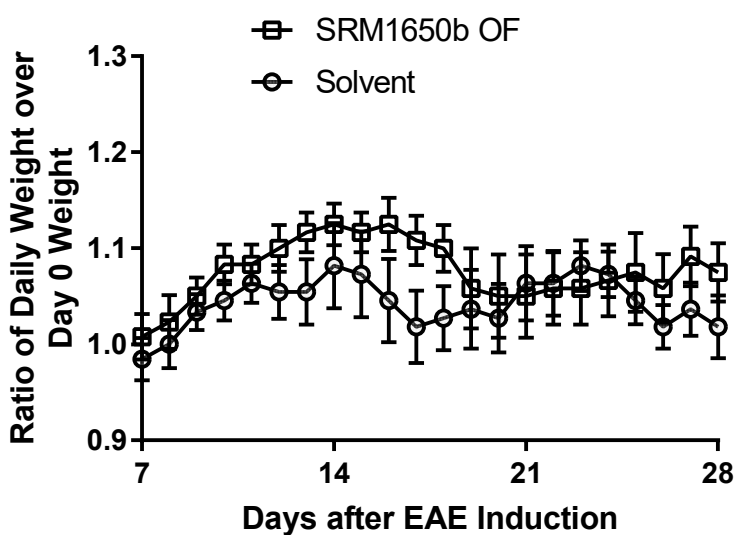**D**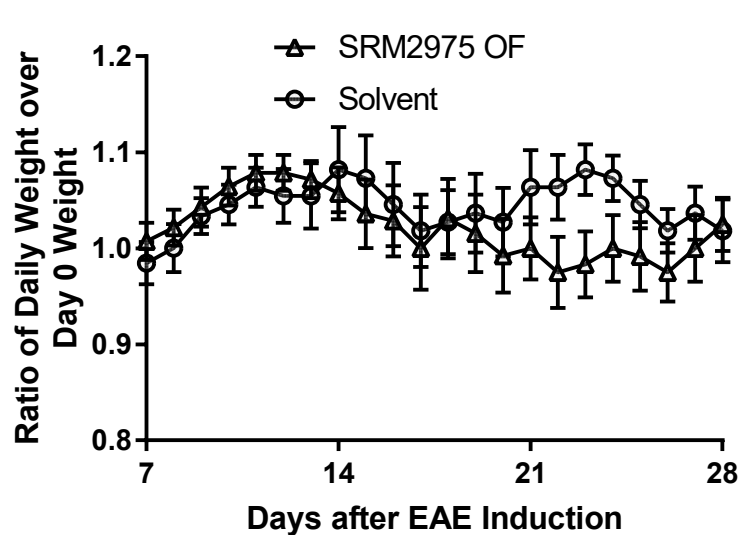

| PAHs                   | SRM1650b            |                              |                                          | SRM2975             |                              |                                          |
|------------------------|---------------------|------------------------------|------------------------------------------|---------------------|------------------------------|------------------------------------------|
|                        | ng PAH/mL extracted | ng PAH/10µg/mL dose exposure | ng/PAH per cell at 10µg/mL dose exposure | ng PAH/mL extracted | ng PAH/10µg/mL dose exposure | ng/PAH per cell at 10µg/mL dose exposure |
| Phenanthrene           | 10943               | 0.76091                      | 5.0727E-06                               | 2529.13             | 1.7923                       | 1.1529E-05                               |
| Anthracene             | 689.50              | 0.04794                      | 3.1963E-07                               | 0                   | 0                            | 0                                        |
| Fluoranthene           | 11568               | 0.80437                      | 5.3625E-06                               | 5801.2              | 3.9666                       | 2.6444E-05                               |
| Pyrene                 | 10613               | 0.73795                      | 4.9196E-06                               | 0                   | 0                            | 0                                        |
| Benz[a]anthracene      | 2451.2              | 0.17044                      | 1.1363E-06                               | 0                   | 0                            | 0                                        |
| Chrysene               | 9680.4              | 0.67313                      | 4.4875E-06                               | 1487.5              | 1.0171                       | 6.7804E-06                               |
| Benzo[b]fluoranthene   | 1913.9              | 0.13308                      | 8.8721E-07                               | 1956.6              | 1.3379                       | 8.9192E-06                               |
| Benzo[k]fluoranthene   | 1153.9              | 0.080233                     | 5.3489E-07                               | 0                   | 0                            | 0                                        |
| Benzo[e]pyrene         | 1522.0              | 0.10583                      | 7.0554E-07                               | 164.27              | 0.11232                      | 7.4881E-07                               |
| Benzo[a]pyrene         | 317.85              | 0.022102                     | 1.4735E-07                               | 0                   | 0                            | 0                                        |
| Perylene               | 0                   | 0                            | 0                                        | 0                   | 0                            | 0                                        |
| Indeno[1,2,3-cd]pyrene | 1391.48             | 0.096756                     | 6.4504E-07                               | 249.72              | 0.17075                      | 1.1383E-06                               |
| Benzo[g,h,i]perylene   | 1550.83             | 0.10784                      | 7.1891E-07                               | 0                   | 0                            | 0                                        |
| Dibenz[a,h]anthracene  | 0                   | 0                            | 0                                        | 0                   | 0                            | 0                                        |
| Picene                 | 0                   | 0                            | 0                                        | 0                   | 0                            | 0                                        |

**Table S1: PAH concentrations in OF extracts.** PAH concentrations of 15 EPA

PAHs of concern for SRM1650b and SRM2975 OF. The ng of each PAH that was extracted using the DCM/DMSO solvent extraction was measured. The PAH concentrations are shown in ng of individual PAHs present in the highest 10µg/mL OC exposure of the OF. Additionally, ng of PAH per cell in the highest 10µg/mL OC exposure was also calculated.

| PAHs                       | SRM1650b |                                      |                                              | SRM2975   |                                      |                                           |
|----------------------------|----------|--------------------------------------|----------------------------------------------|-----------|--------------------------------------|-------------------------------------------|
|                            | ng PAH   | ng PAH/<br>10µg/mL<br>OC<br>exposure | ng PAH/ cell<br>at 10µg/mL<br>OC<br>exposure | ng<br>PAH | ng PAH/<br>10µg/mL<br>OC<br>exposure | ng PAH/ cell<br>at 10µg/mL<br>OC exposure |
| Phenanthrene               | 10.948   | 0.72989                              | 4.8659E-06                                   | 12.641    | 1.6855                               | 1.1237E-05                                |
| Anthracene                 | 0.68984  | 0.045990                             | 3.0660E-07                                   | 0         | 0                                    | 0                                         |
| Fluoranthene               | 11.573   | 0.77158                              | 5.1438E-06                                   | 28.771    | 3.8362                               | 2.5575E-05                                |
| Pyrene                     | 10.618   | 0.70786                              | 4.7191E-06                                   | 0         | 0                                    | 0                                         |
| Benz[a]anthracene          | 2.4524   | 0.16350                              | 1.0900E-06                                   | 0         | 0                                    | 0                                         |
| Chrysene                   | 9.6853   | 0.64568                              | 4.3046E-06                                   | 7.3772    | 0.9836                               | 6.5575E-06                                |
| Benzo[b]fluoranthene       | 1.9148   | 0.12766                              | 8.5104E-07                                   | 9.7041    | 1.2939                               | 8.6259E-06                                |
| Benzo[k]fluoranthene       | 1.1544   | 0.07696                              | 5.1308E-07                                   | 0         | 0                                    | 0                                         |
| Benzo[e]pyrene             | 1.5227   | 0.10152                              | 6.7678E-07                                   | 0.8147    | 0.1086                               | 7.2419E-07                                |
| Benzo[a]pyrene             | 0.31801  | 0.02120                              | 1.4134E-07                                   | 0         | 0                                    | 0                                         |
| Perylene                   | 0        | 0                                    | 0                                            | 0         | 0                                    | 0                                         |
| Indeno[1,2,3-cd]<br>pyrene | 1.39218  | 0.092812                             | 6.1875E-07                                   | 1.2385    | 0.1651                               | 1.1009E-06                                |
| Benzo[g,h,i]perylene       | 1.5516   | 0.10344                              | 6.8960E-07                                   | 0         | 0                                    | 0                                         |
| Dibenz[a,h]anthracene      | 0        | 0                                    | 0                                            | 0         | 0                                    | 0                                         |
| Picene                     | 0        | 0                                    | 0                                            | 0         | 0                                    | 0                                         |

**Table S2: PAH mixture PAH concentrations.** PAH concentrations of 15 EPA PAHs of concern for SRM1650b and SRM2975. The PAH concentrations were measured in ug/mL of PAH extracted as well as ng of individual PAHs present in the highest 10µg/mL OC exposure. Additionally, ng of PAH per cell at the highest 10µg/mL dose was calculated.

| Dose ( $\mu\text{g/mL}$ PM) | SRM1650b   |                     |            | SRM2975    |                     |            |
|-----------------------------|------------|---------------------|------------|------------|---------------------|------------|
|                             | pg PM/cell | $\mu\text{g}$ OC/mL | pg OC/cell | pg PM/cell | $\mu\text{g}$ OC/mL | pg OC/cell |
| 40                          | 0.17       | 9.0                 | 0.038      | 0.17       | 2.3                 | 9.9E-03    |
| 20                          | 0.043      | 4.5                 | 9.6E-03    | 0.043      | 1.2                 | 2.5E-03    |
| 12.5                        | 0.017      | 2.8                 | 3.8E-03    | 0.017      | 0.73                | 9.7E-04    |
| 3.125                       | 0.0010     | 0.70                | 2.3E-04    | 0.0010     | 0.18                | 6.0E-06    |
| 0.78                        | 0.00013    | 0.18                | 2.9E-05    | 0.00013    | 0.050               | 7.5E-06    |

**Table S3: PM *in vitro* dose conversion.** This table converts the PM doses based on mass of PM to mass of organic carbon. Additionally, mass of PM and mass of OC per cell are calculated.

| Dose<br>(ug/mL<br>OC) | SRM1650b   |            |            | SRM2975    |           |            |
|-----------------------|------------|------------|------------|------------|-----------|------------|
|                       | pg OC/cell | µg PM/mL   | pg PM/cell | pg OC/cell | µg PM/mL  | pg PM/cell |
| 10                    | 4.667E-03  | 44.44      | 0.02074    | 0.04533    | 172.4     | 0.7816     |
| 5                     | 2.333E-03  | 22.22      | 0.0137     | 0.02267    | 86.21     | 0.3908     |
| 1                     | 4.667E-04  | 4.444      | 2.074E-03  | 4.533E-03  | 17.24     | 0.07816    |
| 0.1                   | 4.667E-05  | 0.4444     | 2.074E-04  | 4.533E-04  | 1.724     | 7.816E-03  |
| 0.01                  | 4.667E-06  | 0.04444    | 2.074E-05  | 4.533E-05  | 0.1724    | 7.816E-04  |
| 0.001                 | 4.667E-07  | 0.004444   | 2.074E-06  | 4.533E-06  | 0.01724   | 7.816E-05  |
| 0.0001                | 4.667E-08  | 0.0004444  | 2.074E-07  | 4.533E-07  | 0.001724  | 7.816E-06  |
| 0.00001               | 4.667E-09  | 0.00004444 | 2.074E-08  | 4.533E-08  | 0.0001724 | 7.816E-07  |

**Table S4: OF *in vitro* dose conversion.** This table converts the OF and PAH mixture doses based on organic carbon to a measure based on mass of PM. Additionally, mass of OC and mass of PM per cell are calculated.
